# Supplementary material
Source: PubMed Central journal article supplement (PMC11027722)
Supplement: 262_2020_2576_MOESM1_ESM.pdf [file 262_2020_2576_MOESM1_ESM.pdf]

## Supplementary file

### Suppl.1 The statistical data of Western Blot about the upregulation of VEGFA in CT26 and

#### 4T1 cells

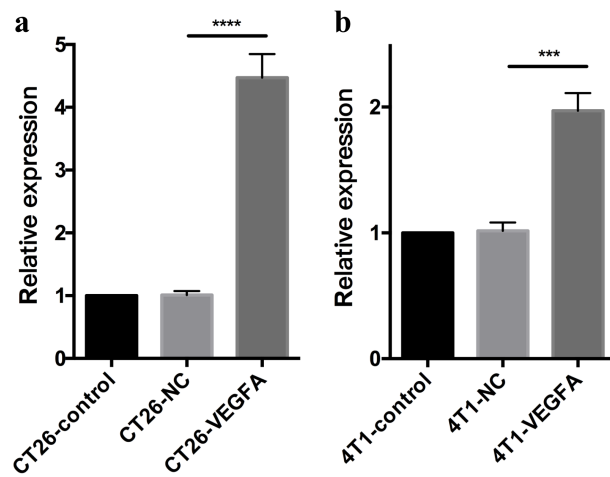

Western blot detected the expression of VEGFA in both CT26 and 4T1 cells after infection with VEGFA lentivirus.

### Suppl.2 Weight variety and weight of mice during the treatment period in CT26 and 4T1

#### groups

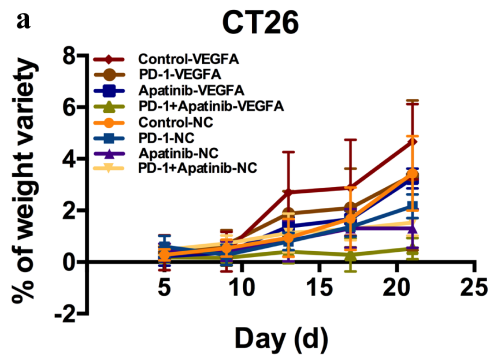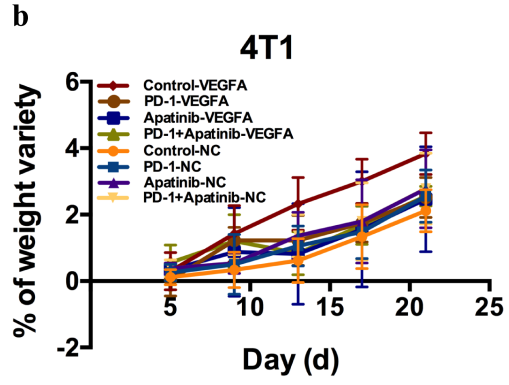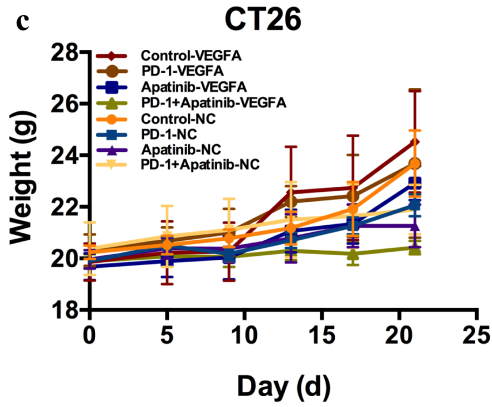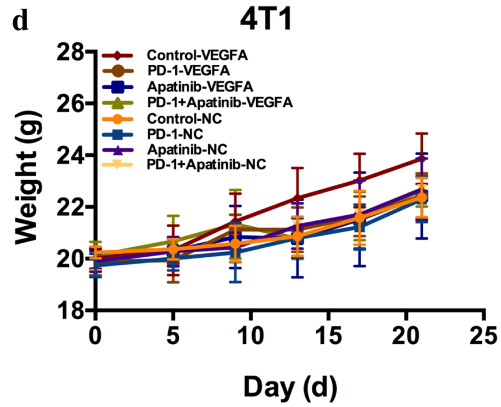

Weight of mice were monitored during the treatment. Mice in the control-VEGFA group experienced the greatest weight change due to rapid tumor growth.
